# Supplementary material
Source: Springer Nature journal article supplement (https://www.springermedizin.de/resource/supplementary/12943_2009_643_MOESM3_ESM.pdf/9554468)

**A**

| Clone# | Subclass | ELISA  | WB     | IF    | IHC   |
|--------|----------|--------|--------|-------|-------|
| 209    | IgG1     | 1:3000 | 1:2000 | 1:100 | 1:100 |

**B**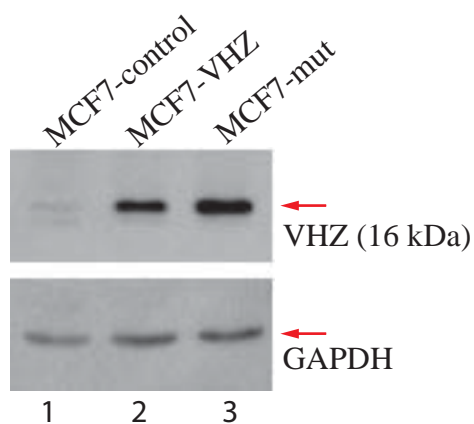**C**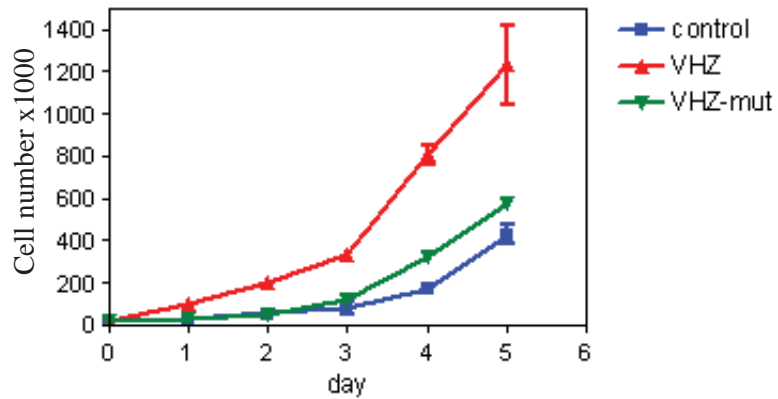**D**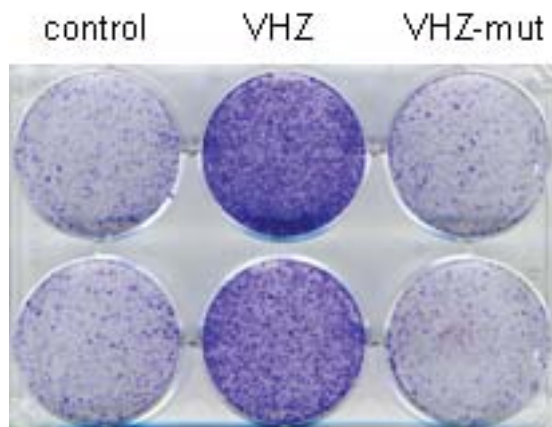

Supplement: MOESM3 [file 9554468]
